# Supplementary material
Source: publisher site journal article supplement (https://www.dovepress.com/article/532001)
Supplement: Supplementary file 1 [file supplement%20Table%20S1_6%252526Figure%20S1_3%252526_2.docx]

| **MeSH** | **Oxidative Stress** | | **Dry Eye Syndromes** |
| --- | --- | --- | --- |
| **Entry Terms** | Oxidative Stresses | Oxidative Damages | Dry Eye Syndrome |
| Stress, Oxidative | Oxidative Injury | Dry Eye Disease |
| Oxidative DNA Damage | Injury, Oxidative | Dry Eye Diseases |
| Damage, Oxidative DNA | Oxidative Injuries | Dry Eye |
| DNA Damage, Oxidative | Oxidative Stress Injury | Dry Eyes |
| Oxidative DNA Damages | Injury, Oxidative Stress | Evaporative Dry Eye Disease |
| DNA Oxidative Damage | Oxidative Stress Injuries | Evaporative Dry Eye |
| Damage, DNA Oxidative | Stress Injury, Oxidative | Dry Eye, Evaporative |
| DNA Oxidative Damages | Oxidative Cleavage | Evaporative Dry Eyes |
| Oxidative Damage, DNA | Cleavage, Oxidative | Evaporative Dry Eye Syndrome |
| Oxidative and Nitrosative Stress | Oxidative Cleavages | Keratoconjunctivitis Sicca |
| Nitro-Oxidative Stress | Antioxidative Stress | Xerophthalmia |
| Nitro Oxidative Stress | Antioxidative Stresses |  |
| Nitro-Oxidative Stresses | Stress, Antioxidative |  |
| Stresses, Nitro-Oxidative | Anti-oxidative Stress |  |
| Stress, Nitro-Oxidative | Anti oxidative Stress |  |
| Oxidative Nitrative Stress | Anti-oxidative Stresses |  |
| Nitrative Stress, Oxidative | Stress, Anti-oxidative |  |
| Oxidative Nitrative Stresses | Nitrosative Stress |  |
| Stress, Oxidative Nitrative | Protein Carbamylation |  |
| Oxidative Damage | Protein Carbonylation |  |
| Damage, Oxidative |  |  |
| [Footnote：MeSH and Entry Terms is obtained by https://www.ncbi.nlm.nih.gov/mesh/](https://www.ncbi.nlm.nih.gov/mesh/) | | | |

**Table S1.**The collection of keywords derived from MeSH and Entry Terms

**Table S2.** Search terms related to “Oxidative Stress”

| **Corresponding topic** | | | | |
| --- | --- | --- | --- | --- |
| **Oxidative Stress** | **Oxidative and Nitrosative Stress** | **Oxidative DNA Damage** | **Anti-oxidative Stress** | **Oxidative Cleavage** |
| "oxidative NEAR/1 stress*" | "oxidative and nitrosative stress*" | "oxidative NEAR/1 DNA damage*" | "anti-oxidative stress*" | "oxidative NEAR/1 cleavage*" |
| Oxidative Stresse | Oxidative and Nitrosative Stress | DNA Damage, Oxidative | Anti-oxidative Stress | Oxidative Cleavage |
| Oxidative Stresses |  | Oxidative DNA Damages | Anti-oxidative Stresses | Cleavage, Oxidative |
| Stress, Oxidative |  |  |  | Oxidative Cleavages |
| "oxidative NEAR/1 damage*" | "nitrative NEAR/2 oxidative NEAR/2 stress*" OR "stress, oxidative nitrative" | "oxidative DNA damage*" | "anti NEAR/2 oxidative NEAR/2 stress*" OR "stress*, anti-oxidative" OR "stress*, antioxidative" |  |
| Oxidative Damage | Nitrative Stress, Oxidative | Oxidative DNA Damages | Anti oxidative Stress |  |
| Damage, Oxidative | Stress, Oxidative Nitrative | Oxidative DNA Damage | Stress, Anti-oxidative |  |
| Oxidative Damages |  |  | Stress, Antioxidative |  |
|  |  |  | Antioxidative Stresses |  |
| "oxidative NEAR/1 injury*" | "oxidative nitrative stress*" | "DNA oxidative damage*" |  |  |
| Oxidative Injury | Oxidative Nitrative Stress | DNA Oxidative Damage |  |  |
| Oxidative Injuries | Oxidative Nitrative Stresses | DNA Oxidative Damages |  |  |
| Injury, Oxidative |  |  |  |  |
| "oxidative NEAR/2 stress NEAR/2 injur*" OR "injury, oxidative stress*" OR "stress injur*, oxidative" | "nitro NEAR/2 oxidative NEAR/2 stress* OR "stress* NEAR/1 nitro-oxidative" | "damage*, oxidative DNA" OR "damage*, DNA oxidative" OR "oxidative damage*, DNA" |  |  |
| Oxidative Stress Injury | Stresses, Nitro-Oxidative | Damage*, Oxidative DNA |  |  |
| Injury, Oxidative Stress | Stress, Nitro-Oxidative | Damage*, DNA Oxidative |  |  |
| Stress Injury, Oxidative | Nitro Oxidative Stress | Oxidative Damage*, DNA |  |  |
| "Protein NEAR/1 Carbamylation" OR "Protein NEAR/1 Carbonylation" | "nitro-oxidative stress*" |  |  |  |
| Protein Carbamylation | Nitro-Oxidative Stress |  |  |  |
| Protein Carbonylation | Nitro-Oxidative Stresses |  |  |  |
|  | "nitrosative stress*" OR "stress*, nitrosative" |  |  |  |
|  | Nitrosative Stress |  |  |  |
| TS=("oxidative NEAR/1 stress*" OR "oxidative and nitrosative stress*" OR "oxidative NEAR/1 DNA damage*" OR "anti-oxidative stress*" OR "oxidative NEAR/1 cleavage*" OR "oxidative NEAR/1 damage*" OR "nitrative NEAR/2 oxidative NEAR/2 stress*" OR "stress, oxidative nitrative" OR "oxidative DNA damage*" OR "anti NEAR/2 oxidative NEAR/2 stress*" OR "stress*, anti-oxidative" OR "stress*, antioxidative" OR "oxidative NEAR/1 injury*" OR "oxidative nitrative stress*" OR "DNA oxidative damage*" OR "oxidative NEAR/2 stress NEAR/2 injur*" OR "injury, oxidative stress*" OR "stress injur*, oxidative" OR "nitro NEAR/2 oxidative NEAR/2 stress*" OR "stress* NEAR/1 nitro-oxidative" OR "damage*, oxidative DNA" OR "damage*, DNA oxidative" OR "oxidative damage*, DNA" OR "nitro-oxidative stress*" OR "nitrosative stress*" OR "stress*, nitrosative" OR "Protein NEAR/1 Carbamylation" OR "Protein NEAR/1 Carbonylation") | | | | |
| **Oxidative Stress-related Molecules, Enzymes, and Biological Processes** | | | | |
| "Reactive Oxygen Species" OR "ROS" OR "Reactive Nitrogen Species" OR "RNS" OR "Free Radical*" OR "Catalase" OR "Superoxide Dismutase" OR "SOD" OR "Glutathione" OR "GPx" OR "NADPH oxidase*" OR "Nrf2" OR "Nuclear Factor E2 Related Factor 2" OR "Oxidant*" OR "Lipid Peroxidation" OR "Hydrogen Peroxide" OR "H2O2" | | | | |
| **Footnote:** Entry Terms are divided into five subtopics by MeSH word search, as seen in the red rows; after that, they are further divided into five subtopics according to different Entry Terms terms and give the corresponding search formulas, as seen in the gray boxes. | | | | |

**Table S3.** Search terms related to “Dry Eye Syndromes”

| “dry eye*” | “dry eye disease*” | “dry eye syndrom*” | “evaporative dry eye*” |
| --- | --- | --- | --- |
| Dry Eye | Dry Eye Disease | Dry Eye Syndrome | Evaporative Dry Eye |
| Dry Eyes | Dry Eye Diseases | Dry Eye Syndromes | Evaporative Dry Eyes |
| “dry eye,evaporative” | “xerophthalmia” | “keratoconjunctivitis sicca” | Evaporative Dry Eye Syndrome |
| Dry Eye, Evaporative | Xerophthalmia | Keratoconjunctivitis Sicca | Evaporative Dry Eye Disease |
| **The retrieval formula after merging the above retrieval formula** | | | |
| TS= ( "dry eye*" OR "dry eye disease*" OR "dry eye syndrom*" OR "evaporative dry eye*" OR "dry eye, evaporative" OR "xerophthalmia" OR "keratoconjunctivitis sicca") | | | |

**Table S4.** Search history in WoS

| Entitlements | Type | Search Query | Database | Results | Date Run |
| --- | --- | --- | --- | --- | --- |
| - WOS.IC: 1993 to 2024 - WOS.CCR: 1985 to 2024 - WOS.SCI: 1992 to 2024 | Search | TS=(oxidative NEAR/1 stress* OR oxidative AND nitrosative stress* OR oxidative NEAR/1 DNA damage* OR anti-oxidative stress* OR oxidative NEAR/1 cleavage* OR oxidative NEAR/1 damage* OR nitrative NEAR/2 oxidative NEAR/2 stress* OR stress, oxidative nitrative OR oxidative DNA damage* OR anti NEAR/2 oxidative NEAR/2 stress* OR stress*, anti-oxidative OR stress*, antioxidative OR oxidative NEAR/1 injury* OR oxidative nitrative stress* OR DNA oxidative damage* OR oxidative NEAR/2 stress NEAR/2 injur* OR injury, oxidative stress* OR stress injur*, oxidative OR nitro NEAR/2 oxidative NEAR/2 stress* OR stress* NEAR/1 nitro-oxidative OR oxidative DNA damage* OR nitro-oxidative stress* OR nitrosative stress* OR stress*, nitrosative OR Protein NEAR/1 Carbamylation OR Protein NEAR/1 Carbonylation) Editions: WOS.SCI Timespan: 1992-01-01 to 2024-12-31 | Web of Science Core Collection | 562744 | Thu Jan 02 2025 15:07:32 GMT+0800 (中国标准时间) |
| - WOS.IC: 1993 to 2024 - WOS.CCR: 1985 to 2024 - WOS.SCI: 1992 to 2024 | Search | TS=(Reactive Oxygen Species OR ROS OR Reactive Nitrogen Species OR RNS OR Free Radical* OR Catalase OR Superoxide Dismutase OR SOD OR Glutathione OR GPx OR NADPH oxidase* OR Nrf2 OR Nuclear Factor E2 Related Factor 2 OR Oxidant* OR Lipid Peroxidation OR Hydrogen Peroxide OR H2O2) Editions: WOS.SCI Timespan: 1992-01-01 to 2024-12-31 | Web of Science Core Collection | 996693 | Thu Jan 02 2025 15:07:41 GMT+0800 (中国标准时间) |
| - WOS.IC: 1993 to 2024 - WOS.CCR: 1985 to 2024 - WOS.SCI: 1992 to 2024 | Search | (TS=(oxidative NEAR/1 stress* OR oxidative AND nitrosative stress* OR oxidative NEAR/1 DNA damage* OR anti-oxidative stress* OR oxidative NEAR/1 cleavage* OR oxidative NEAR/1 damage* OR nitrative NEAR/2 oxidative NEAR/2 stress* OR stress, oxidative nitrative OR oxidative DNA damage* OR anti NEAR/2 oxidative NEAR/2 stress* OR stress*, anti-oxidative OR stress*, antioxidative OR oxidative NEAR/1 injury* OR oxidative nitrative stress* OR DNA oxidative damage* OR oxidative NEAR/2 stress NEAR/2 injur* OR injury, oxidative stress* OR stress injur*, oxidative OR nitro NEAR/2 oxidative NEAR/2 stress* OR stress* NEAR/1 nitro-oxidative OR oxidative DNA damage* OR nitro-oxidative stress* OR nitrosative stress* OR stress*, nitrosative OR Protein NEAR/1 Carbamylation OR Protein NEAR/1 Carbonylation)) OR TS=(Reactive Oxygen Species OR ROS OR Reactive Nitrogen Species OR RNS OR Free Radical* OR Catalase OR Superoxide Dismutase OR SOD OR Glutathione OR GPx OR NADPH oxidase* OR Nrf2 OR Nuclear Factor E2 Related Factor 2 OR Oxidant* OR Lipid Peroxidation OR Hydrogen Peroxide OR H2O2) Editions: WOS.SCI Timespan: 1992-01-01 to 2024-12-31 | Web of Science Core Collection | 1253701 | Thu Jan 02 2025 15:07:54 GMT+0800 (中国标准时间) |
| - WOS.IC: 1993 to 2024 - WOS.CCR: 1985 to 2024 - WOS.SCI: 1992 to 2024 | Search | TS=("dry eye*" OR "dry eye disease*" OR "dry eye syndrom*" OR "evaporative dry eye*" OR "dry eye, evaporative" OR "xerophthalmia" OR "keratoconjunctivitis sicca") Editions: WOS.SCI Timespan: 1992-01-01 to 2024-12-31 | Web of Science Core Collection | 17401 | Thu Jan 02 2025 15:08:04 GMT+0800 (中国标准时间) |
| - WOS.IC: 1993 to 2024 - WOS.CCR: 1985 to 2024 - WOS.SCI: 1992 to 2024 | Search | ((TS=(oxidative NEAR/1 stress* OR oxidative AND nitrosative stress* OR oxidative NEAR/1 DNA damage* OR anti-oxidative stress* OR oxidative NEAR/1 cleavage* OR oxidative NEAR/1 damage* OR nitrative NEAR/2 oxidative NEAR/2 stress* OR stress, oxidative nitrative OR oxidative DNA damage* OR anti NEAR/2 oxidative NEAR/2 stress* OR stress*, anti-oxidative OR stress*, antioxidative OR oxidative NEAR/1 injury* OR oxidative nitrative stress* OR DNA oxidative damage* OR oxidative NEAR/2 stress NEAR/2 injur* OR injury, oxidative stress* OR stress injur*, oxidative OR nitro NEAR/2 oxidative NEAR/2 stress* OR stress* NEAR/1 nitro-oxidative OR oxidative DNA damage* OR nitro-oxidative stress* OR nitrosative stress* OR stress*, nitrosative OR Protein NEAR/1 Carbamylation OR Protein NEAR/1 Carbonylation)) OR TS=(Reactive Oxygen Species OR ROS OR Reactive Nitrogen Species OR RNS OR Free Radical* OR Catalase OR Superoxide Dismutase OR SOD OR Glutathione OR GPx OR NADPH oxidase* OR Nrf2 OR Nuclear Factor E2 Related Factor 2 OR Oxidant* OR Lipid Peroxidation OR Hydrogen Peroxide OR H2O2)) AND TS=("dry eye*" OR "dry eye disease*" OR "dry eye syndrom*" OR "evaporative dry eye*" OR "dry eye, evaporative" OR "xerophthalmia" OR "keratoconjunctivitis sicca") Editions: WOS.SCI Timespan: 1992-01-01 to 2024-12-31 | Web of Science Core Collection | 620 | Thu Jan 02 2025 15:08:14 GMT+0800 (中国标准时间) |
| - WOS.IC: 1993 to 2024 - WOS.CCR: 1985 to 2024 - WOS.SCI: 1992 to 2024 | Search | ((TS=(oxidative NEAR/1 stress* OR oxidative AND nitrosative stress* OR oxidative NEAR/1 DNA damage* OR anti-oxidative stress* OR oxidative NEAR/1 cleavage* OR oxidative NEAR/1 damage* OR nitrative NEAR/2 oxidative NEAR/2 stress* OR stress, oxidative nitrative OR oxidative DNA damage* OR anti NEAR/2 oxidative NEAR/2 stress* OR stress*, anti-oxidative OR stress*, antioxidative OR oxidative NEAR/1 injury* OR oxidative nitrative stress* OR DNA oxidative damage* OR oxidative NEAR/2 stress NEAR/2 injur* OR injury, oxidative stress* OR stress injur*, oxidative OR nitro NEAR/2 oxidative NEAR/2 stress* OR stress* NEAR/1 nitro-oxidative OR oxidative DNA damage* OR nitro-oxidative stress* OR nitrosative stress* OR stress*, nitrosative OR Protein NEAR/1 Carbamylation OR Protein NEAR/1 Carbonylation)) OR TS=(Reactive Oxygen Species OR ROS OR Reactive Nitrogen Species OR RNS OR Free Radical* OR Catalase OR Superoxide Dismutase OR SOD OR Glutathione OR GPx OR NADPH oxidase* OR Nrf2 OR Nuclear Factor E2 Related Factor 2 OR Oxidant* OR Lipid Peroxidation OR Hydrogen Peroxide OR H2O2)) AND TS=("dry eye*" OR "dry eye disease*" OR "dry eye syndrom*" OR "evaporative dry eye*" OR "dry eye, evaporative" OR "xerophthalmia" OR "keratoconjunctivitis sicca") and Article or Review Article (Document Types) Editions: WOS.SCI Timespan: 1992-01-01 to 2024-12-31 | Web of Science Core Collection | 594 | Thu Jan 02 2025 15:08:46 GMT+0800 (中国标准时间) |
| - WOS.IC: 1993 to 2024 - WOS.CCR: 1985 to 2024 - WOS.SCI: 1992 to 2024 | Search | ((TS=(oxidative NEAR/1 stress* OR oxidative AND nitrosative stress* OR oxidative NEAR/1 DNA damage* OR anti-oxidative stress* OR oxidative NEAR/1 cleavage* OR oxidative NEAR/1 damage* OR nitrative NEAR/2 oxidative NEAR/2 stress* OR stress, oxidative nitrative OR oxidative DNA damage* OR anti NEAR/2 oxidative NEAR/2 stress* OR stress*, anti-oxidative OR stress*, antioxidative OR oxidative NEAR/1 injury* OR oxidative nitrative stress* OR DNA oxidative damage* OR oxidative NEAR/2 stress NEAR/2 injur* OR injury, oxidative stress* OR stress injur*, oxidative OR nitro NEAR/2 oxidative NEAR/2 stress* OR stress* NEAR/1 nitro-oxidative OR oxidative DNA damage* OR nitro-oxidative stress* OR nitrosative stress* OR stress*, nitrosative OR Protein NEAR/1 Carbamylation OR Protein NEAR/1 Carbonylation)) OR TS=(Reactive Oxygen Species OR ROS OR Reactive Nitrogen Species OR RNS OR Free Radical* OR Catalase OR Superoxide Dismutase OR SOD OR Glutathione OR GPx OR NADPH oxidase* OR Nrf2 OR Nuclear Factor E2 Related Factor 2 OR Oxidant* OR Lipid Peroxidation OR Hydrogen Peroxide OR H2O2)) AND TS=("dry eye*" OR "dry eye disease*" OR "dry eye syndrom*" OR "evaporative dry eye*" OR "dry eye, evaporative" OR "xerophthalmia" OR "keratoconjunctivitis sicca") and Article or Review Article (Document Types) and English (Languages) Editions: WOS.SCI Timespan: 1992-01-01 to 2024-12-31 | Web of Science Core Collection | 586 | Thu Jan 02 2025 15:09:49 GMT+0800 (中国标准时间) |

**Table S5**. Comparison of AIC and BIC for polynomial models

| Degrees | AIC | BIC |
| --- | --- | --- |
| 1 | 247.97 | 252.18 |
| 2 | 188.43 | 194.04 |
| 3 | 127.62 | 134.62 |

**Table S6**. Coefficients of the third_degree polynomial regression model

| Term | Estimate | Std. Error | t value | Pr(>t) |
| --- | --- | --- | --- | --- |
| Intercept (β0) | 19.6 | 0.34 | 58.16 | < 0.001 |
| Year (β1) | 122.47 | 1.85 | 66.36 | < 0.001 |
| Year (β2) | 69.81 | 1.85 | 37.82 | < 0.001 |
| Year (β3) | 25.11 | 1.85 | 13.6 | < 0.001 |

The estimated coefficients and their statistical significance are presented in Table S6. The intercept (β0) was 19.60 (SE = 0.34, t = 58.16, p < 0.001), indicating the baseline level of total publications. The first-degree term (β1) was 122.47 (SE = 1.85, t = 66.36, p < 0.001), suggesting a strong linear increase in publications over time. The second-degree term (β2) was 69.81 (SE = 1.85, t = 37.82, p < 0.001), indicating a significant quadratic trend. The third-degree term (β3) was 25.11 (SE = 1.85, t = 13.60, p < 0.001), reflecting a cubic pattern in the data. All polynomial terms were statistically significant (p < 0.001), confirming their contribution to the model.


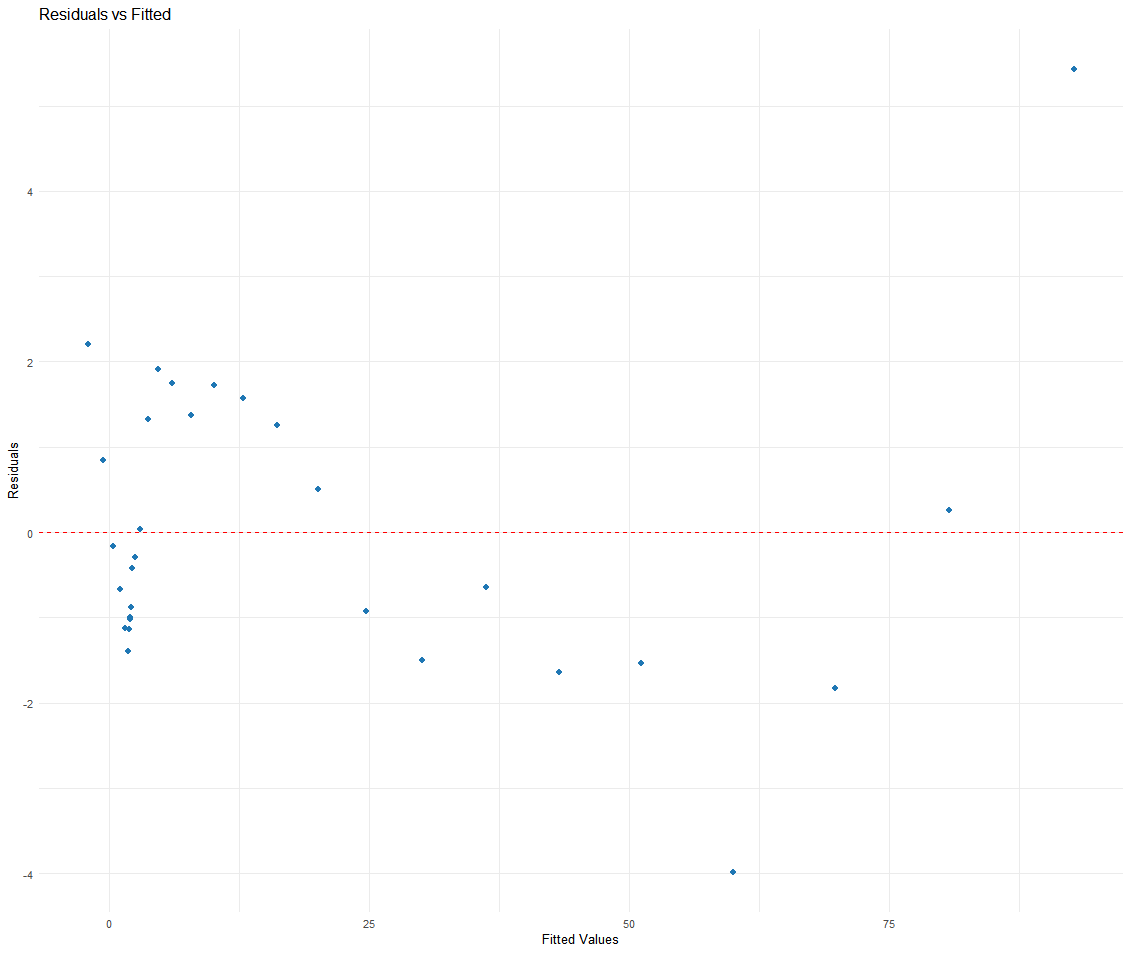
**Figure S1**. Residuals vs fitted values.


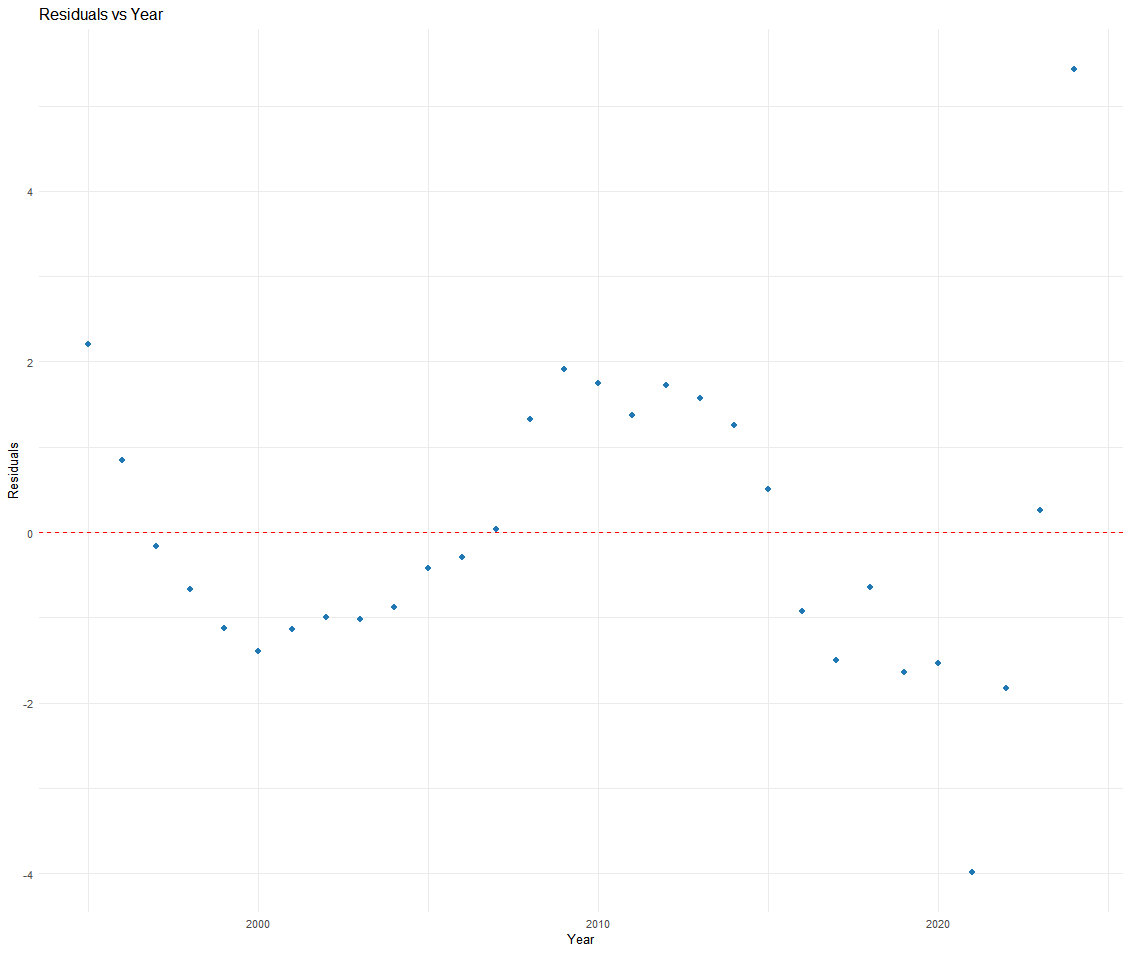
**Figure S2**. Residuals vs time.

**
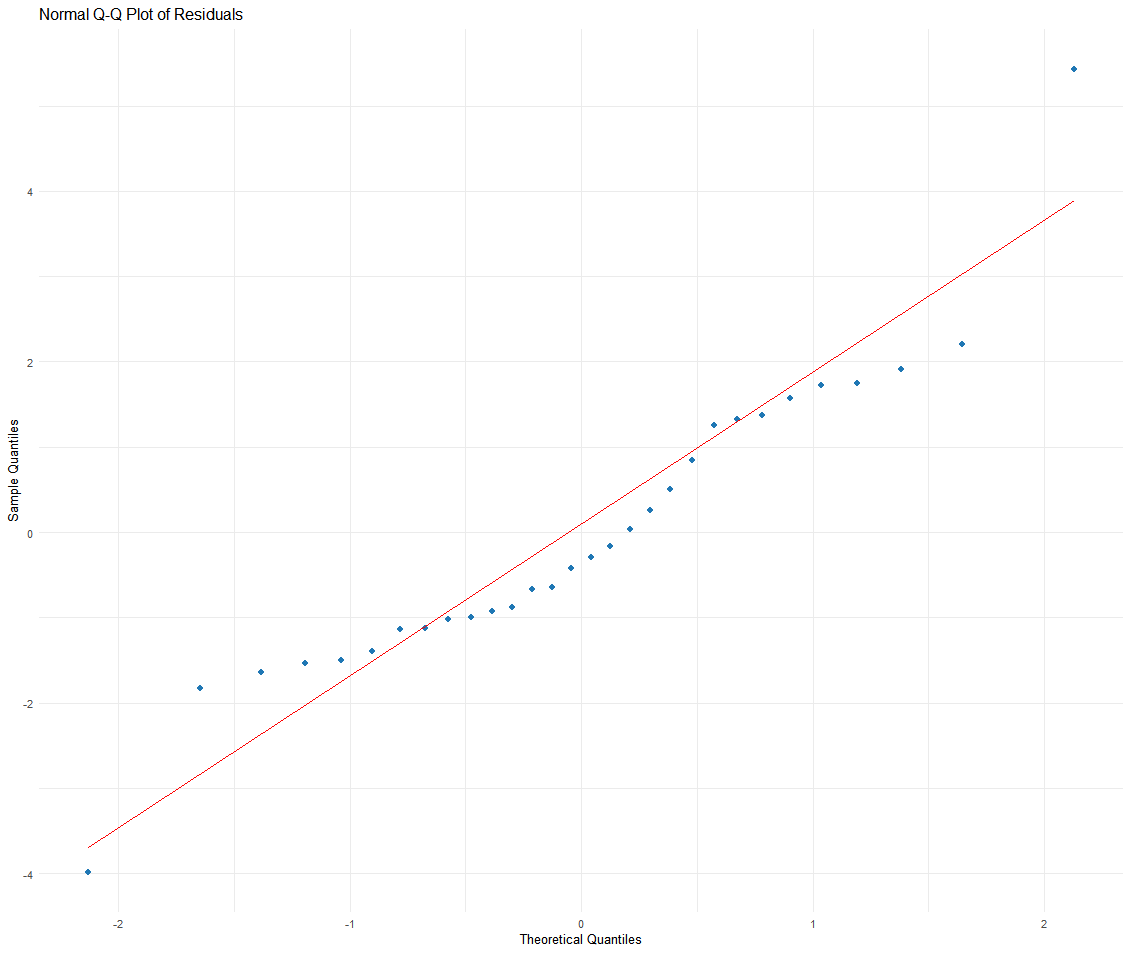
Figure S3.** Normal Q_Q plot.
